# Supplementary material
Source: PubMed Central journal article supplement (PMC2898397)
Supplement: supp_M110.100818_jbc.M110.100818-1.pdf [file supp_M110.100818_jbc.M110.100818-1.pdf]

# Supplemental figure 1.

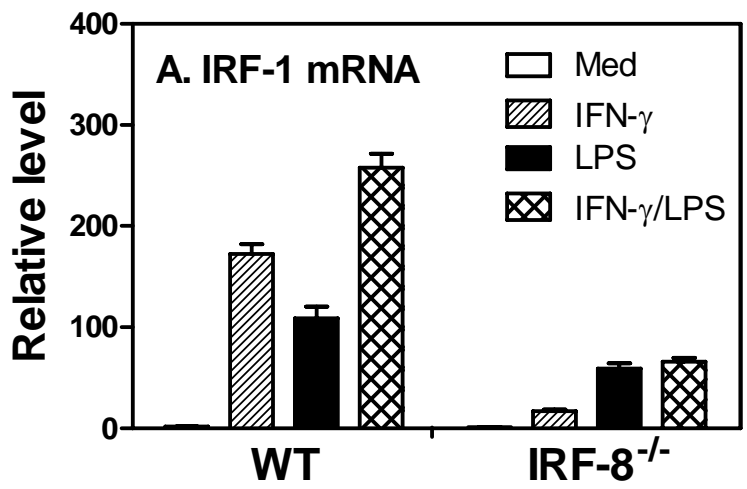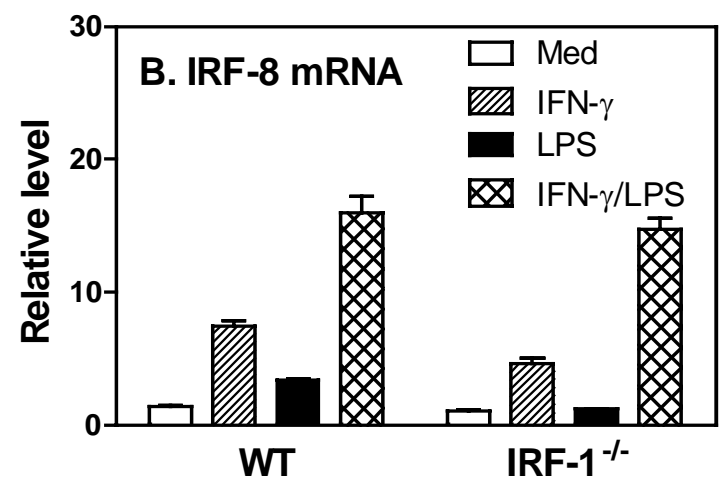

Supplemental figure 2.

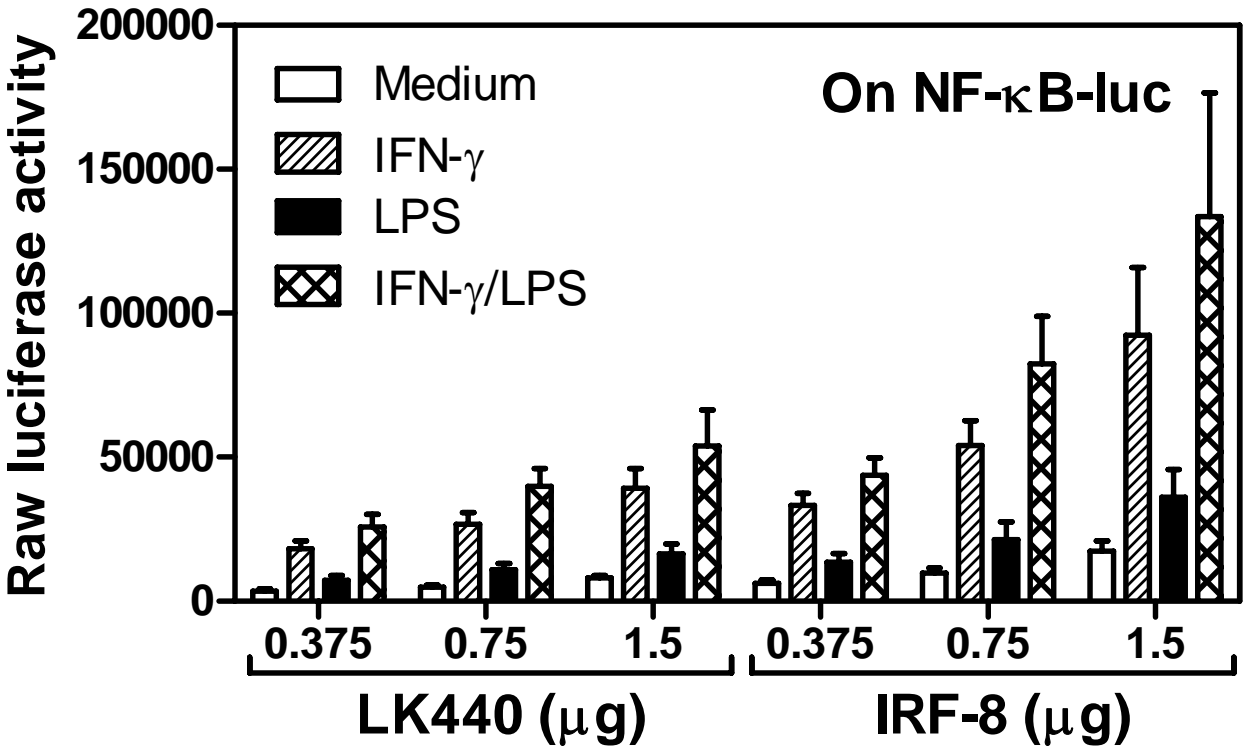

# Supplemental figure 3.

-140 ccctctgggaagggaaattacgtttccccattttagccaggaagactt  
Upstream primer  
-90 agtgaacacaaaagctgaaagtacaagtaggacagaaaagtgaaactggggcg  
IRF1/8-RE  
-40 cagccccagtataagacccccctaccaggagatggctgcacacagagg  
+10 ctgggccctgacatgggccaggtgacaggagaccttggctggcgtgagtt  
+60 ggaagcggcgactgggctgagggctgggaggtttggtggagcccaggaga  
+110 ggttgggaaaagtttgacagg+129  
Downstream primer

## FIGURE LEGEND

**Supplemental figure 1. IRF-1 mRNA expression partially depends on IRF-8.**  $3 \times 10^6$  peritoneal macrophages of WT, IRF-8<sup>-/-</sup> and IRF-1<sup>-/-</sup> mice were stimulated with IFN- $\gamma$ , LPS, and IFN- $\gamma$  plus LPS for 4 hrs, followed by extraction of total RNA for detection of IRF1 (**A**) and IRF-8 (**B**) mRNA expression by quantitative real time PCR. qRT-PCR data were normalized relative to GAPDH mRNA expression levels in each respective sample and further normalized to the results from the un-treated group (Medium), which was set as 1.

**Supplemental figure 2. IRF-8 activates NF- $\kappa$ B activation.** 5  $\mu$ g of NF- $\kappa$ B-luciferase reporter construct was co-transfected with various amounts of IRF-8 and control vector LK440 as indicated into RAW cells. 40 hrs later, the transfected cells were stimulated with IFN- $\gamma$ , LPS or IFN- $\gamma$  plus LPS for 7 hrs, followed by measurement of luciferase activity in cell lysates. Data shown are mean plus SD from three experiments.

**Supplemental figure 3. Sequence of the p28 promoter harboring the IRF-RE.** Sequence of the mouse IL-27 p28 promoter containing the IRF1/8-RE and the pair of PCR primers used to perform ChIP are displayed and underlined.
